# Supplementary material for: Direct estimate of the rate of germline mutation in a bird
Source: HighWire-hosted journal article supplement (doi:10.1101/gr.204669.116), 2016-07-13
Supplement: Supplemental_Table_S1.docx [file Supplemental_Table_S1.docx]

**Supplemental Table S1**. Details about the identified mutation events

| Chromosome | Scaffold | Position | Parental origin | Reference allele | Mutant allele |
| --- | --- | --- | --- | --- | --- |
| 1 | N00020 | 4892084 | - | C | T |
| 1 | N00023 | 3337042 | paternal | G | C |
| 1 | N00026 | 7224337 | paternal | A | G |
| 1 | N00032 | 5405723 | maternal | G | T |
| 1 | N00032 | 1787274 | paternal | T | A |
| 1 | N00050 | 3840259 | - | G | A |
| 1A | N00002 | 15619677 | maternal | T | C |
| 1A | N00123 | 1688079 | paternal | T | G |
| 1A | N00137 | 1126685 | - | G | A |
| 1A | N00151 | 1130841 | - | G | A |
| 1A | N00304 | 324136 | paternal | A | G |
| 2 | N00004 | 10651807 | - | G | C |
| 2 | N00014 | 3297699 | - | C | A |
| 2 | N00003 | 10943352 | maternal | C | T |
| 2 | N00010 | 9770272 | maternal | C | T |
| 2 | N00060 | 2156445 | maternal | G | A |
| 2 | N00414 | 107332 | maternal | G | A |
| 2 | N00116 | 2237041 | - | T | C |
| 2 | N00004 | 7926949 | paternal | A | G |
| 2 | N00009 | 2338098 | paternal | G | C |
| 2 | N00024 | 1668315 | paternal | G | A |
| 2 | N00215 | 865831 | paternal | T | C |
| 2 | N00122 | 1080490 | - | G | A |
| 3 | N00001 | 5157474 | maternal | C | T |
| 3 | N00153 | 113015 | paternal | T | A |
| 3 | N00074 | 4144213 | - | C | T |
| 4 | N00008 | 5137720 | - | C | T |
| 4 | N00017 | 6302285 | - | C | G |
| 4 | N00031 | 8685074 | paternal | A | G |
| 4 | N00127 | 512055 | paternal | A | G |
| 4 | N00130 | 41045 | - | C | T |
| 4A | N00042 | 5847201 | paternal | C | T |
| 4A | N00047 | 1901937 | - | C | T |
| 5 | N00015 | 12692018 | - | C | A |
| 6 | N00006 | 14509527 | maternal | A | G |
| 7 | N00019 | 4781324 | maternal | A | C |
| 7 | N00233 | 588240 | maternal | T | C |
| 7 | N00222 | 338581 | - | G | C |
| 7 | N00019 | 7940446 | paternal | A | C |
| 8 | N00080 | 1816803 | paternal | G | A |
| 9 | N00007 | 8537702 | - | G | A |
| 9 | N00007 | 3507377 | paternal | C | T |
| 9 | N00007 | 10945671 | paternal | T | C |
| 11 | N00156 | 410100 | - | G | A |
| 11 | N00156 | 4365 | maternal | G | A |
| 11 | N00061 | 1557888 | - | G | A |
| 12 | N00021 | 7632559 | - | A | T |
| 14 | N00036 | 3434793 | maternal | G | A |
| 17 | N00138 | 7222 | - | G | A |
| 19 | N00052 | 2385719 | maternal | C | T |
| 23 | N00040 | 178119 | paternal | C | T |
| Z | N00090 | 3132861 | maternal | G | A |
| Z | N00109 | 736901 | maternal | A | G |
| Unknown | N00268 | 170065 | - | A | G |
| Unknown | N01392 | 6492 | - | T | G |

- The parental origin of mutation could not be inferred.
