# Supplementary material for: Direct estimate of the rate of germline mutation in a bird
Source: HighWire-hosted journal article supplement (doi:10.1101/gr.204669.116), 2016-07-13
Supplement: Supplemental_Table_S2.docx [file Supplemental_Table_S2.docx]

**Supplemental Table S2**. Basic data on the birds included in the study including age at sampling (‘0’ denotes birds sampled in the nest as chicks). ‘Coverage’ is the mean autosomal sequence coverage.

| Individual | Generation | Sex | Age | Coverage |
| --- | --- | --- | --- | --- |
| CJ4 | P | Male | ≥2 | 42 |
| CJ0 | P | Female | 2 | 43 |
| BL1 | P | Male | 2 | 43 |
| BY8 | P | Female | 3 | 42 |
| CA2 | F1 | Female | 6 | 38 |
| CL2 | F1 | Male | 1 | 43 |
| CS4 | F2 | Female | 0 | 41 |
| CS5 | F2 | Male | 0 | 36 |
| CS6 | F2 | Male | 0 | 44 |
| CS7 | F2 | Male | 0 | 45 |
| CS9 | F2 | Male | 0 | 45 |
